# Supplementary material for: Factors affecting utilization of cervical cancer screening services among women attending public hospitals in Tigray region, Ethiopia, 2018; Case control study
Source: PubMed Central journal article supplement (PMC6417770; doi:10.1371/journal.pone.0213546), 2019-03-14
Supplement: pone.0213546.s003.pdf [file pone.0213546.s003.pdf]

# ዓዲግራት ዩኒቨርሲቲ

## ናይ ሕክምናን ጥዕና ሳይንስ ኮሌጅ

### ናይ ሕብረተሰብ ጥዕና ኣተሓላልዎ ትምህርቲ ክፍሊ

ንደቂ ኣንስቲዮ ነባሮ ክልል ትግራይ ብዛዕባ ኣብ ፀገም ኣጠቓቕማ ናይ ማህፀን ኣፍ ካንሰር ምርመራ መበገሲታት ዝምልከት ዝተዳለወ መሕትት ::

#### ጥዕና ይሃብለይ፤

ኣነ.....ኣብ ዓዲግራት ዩኒቨርሲቲ ናይ ሕብረተሰብ ጥዕና ኣተሓላልዎ ትምህርቲ ክፍሊ ኣባል ኮይነ ሕዚ ብዛዕባ ናይ ደቂ ኣንስቲዮ ፍልጠት ፣ጽልዮትን ፣ተግባር(ኣጠቓቕማ) ናይ ማህፀን ኣፍ ካንሰር ኣብ ለ ትግራይ ሰሜናዊ ኢትዮጵያ ንመማልኣ ናይ መጀመሪያ ዲግሪ ናይ ሕብረተሰብ ጥዕና ኣተሓላልዎ መፅናዕታዊ ፅሑፍ ያካየድ ኣለኹ:: ጥቅሚ ናይዚ መፅናዕታዊ ፅሑፍ በዛዕባ ናይ ማህፀን ኣፍ ካንሰር ፍልጠት ፣ጽልዮትን ኩነታት ኣጠቓቕማ ንምልካዕ ኮይኑከይዲ ናይ እዚ መፅናዕታዊ ጽሑፍ ኣብ ናይ ክትትልን ቁፅፅርን ገምጋሚ እዩ ዝካየድ እዚ መሕተት ዕዚ ብቃል ኮይኑ እዚ መሕተት ብእንግሊዝኛን ብትግርኛን እዩ ዝተዳለወ::

እዚ ብፈቓደኝነት ዝተመሰረተ መሕተት ካብ 30-40 ደቂቃ ዝወስድ ኮይኑ ኣብዚ መጠይቕ ናይ ዘይምስታፍ መስሎም ዝተሓለወ እዩ ብተወሳኺ ምስታፍ ጀሚርኻም ናይ ምቁራፅ መሰል ኣለኹም::

ነዚ መሕተት ንዝህብዎ ምላሽ ብሙሉእ ምስጢራዊነቱ ዝተሓለወ ስለዝኮነ ምንም ዓይነት ስግኣት ክኣትዎም የብሉን ስለዝኮነ ኣብዚ መሕተት ክሳተፉ ብኸብሪ ንኣትት::

ኣብዚ መፅናዕታዊ ጽሑፍ ንምስታፍ ፍቓደኛ ድዮም ?

እወ \_\_\_\_\_

ኣይኮንኩን \_\_\_\_\_

ንምስታፍ ፈቓደኛ እንተኾይኻም ናብ ዝቀፅል ገፅ ስገር/ሪ

ሓበሬታ:- ኣብዚ ፅንዓት ክትሳተፍ ዘለዎ ኣዶ

- ቅድሚ ሓዚ ናይ ማህፀን ኣፍ ካንሰር ምርመራ ተመርሚራ ዘይትፈልጥ ክትኮን ኣለዎ::
- ጥንስቲ ዘይኮነት ኣዶ 21-50 ዕድመ ዝኮነት ኣዶ

ናይ ኣፍ ማህፀን ካንሰር ምርመራ ዝገበረት

ናይ ኣፍ ማህፀን ካንሰር ምርመራ ዘይገበረት

**1. ኣጠቓላሊ ማሕበራዊ መረዳኢታ ዝተመልከተ መሕተት**

| ተ.ቁ  | ሕቶታት                                     | መልሲ                                                                                                                                                  |
|------|------------------------------------------|------------------------------------------------------------------------------------------------------------------------------------------------------|
| 1.1  | ዕድመ                                      | _____                                                                                                                                                |
| 1.2  | ደረጃ ትምህርቲ                                | 1. ምፅሓፍ ምንባብ ዘይትክእል    2. ምፅሓፍ ምንባብ ዝክእል<br>3. ካብ 1-4 ክፍሊ    4. ካብ 5-8 ክፍሊ    5. ካብ 9-10 ክፍሊ<br>6. ካብ 11-12 ክፍሊ    5. ዲፕሎማ    7. ቀዳማይ ዲግሪን ካብኡ ንላዕሊ? |
| 1.3. | ኩነታት ሓዳር                                 | 1. ዘይተመረጸዎት    2. ዝተመረጸዎት<br>3. ስብኣያ ዝሞታ    4. ዝተፋተሐት                                                                                                |
| 1.4. | ኣብ ክንደይ ዓመትኺ ተመርጻዊኺ? (እንድሕር ዝተመርጸዎት ኮይና) | _____                                                                                                                                                |
| 1.5  | ስራሕ                                      | 1. የቤት እመቤት    2. ሓረስታይ    3. ነጋዴ<br>4. ናይ ማዓልቲ ስራሕተኛ    5. ስራሕተኛ መንግስቲ<br>6. ናይ ውልቕ ስራሕ (ዘይመንግስታዊ ስራሕ)    8. ካሊእ _____                              |
| 1.6  | ወርሓዊ እቶት(ብብር)                            | 1. _____    2. ኣይፈልጦን                                                                                                                                |
| 1.7  | ሃይማኖት                                    | 1. ኦርቶዶክስ ተዋህዶ    2. ሙስሊም    3. ፕሮቴስታንት<br>4. ካቶሊክ    5. ካሊእ _____                                                                                   |
| 1.8  | ብሄር                                      | 1. ትግራይ    2. አምሓራ    3. ካሊእ _____                                                                                                                   |

**2. ተጋሊዲነት ናይ ኣፍ ማህፀን ካንሰር (ምንቀርሳ) ኣብ ሞንጎ ተሳተፍቲ እዚ መፅናእታዊ ጽሑፍ**

| ተ.ቁ  | ሕቶታት                            | መልሲ                |
|------|---------------------------------|--------------------|
| 2.1. | ኣብ ክንደይ ዓመትኺ ሶታዊ ርክብ ጀግርኺ?      | _____              |
| 2.2. | ወሊድኺ ዶ ትፈልጢ?                    | 1. እወ    2. ኣይፈልጥን |
| 2.3. | መልሲ ንተ.ቁ 2.2 እወ እንተኮይኑ ክንደይ ግዜ? | _____              |
| 2.4. | መከላከሊ ጥንሲ ትጠቁምኺ ዶ ትፈልጢ?         | 1. እወ    2. ኣይፈልጥን |

|       |                                                                           |                                                                                  |
|-------|---------------------------------------------------------------------------|----------------------------------------------------------------------------------|
| 2.5.  | መልሱ ንተቁ 2.4 እወ እንተኮይኑ እንታይ ዓይነት መከላከሊ ጥንሲ ትጥቀሚ? (ካብ ሓደ ንላዕሊ ትመርጺ ትኸእሊ ኢኹ) | 1. ከኒና ዝቅበር<br>2. ብመርፍእ ዝውሰድ<br>3. ኣብ ትሕቲ ቆርባት<br>4. ኣብ ማህፀን ዝኣቱ<br>5. ካልእ _____ |
| 2.6.  | መልሱ ንተቁ 2.5 ከኒና እንተኮይኑ ንክንደይ ዓመት ከኒና ተጠቂምኹ?                               | _____ ዓመት                                                                        |
| 2.7.  | ኣብ ከዚ ግዜ ዝዋሓጥ ከኒን ትወስዲ ዲኹ?                                                | 1. እወ<br>2. ኣይወስድን                                                               |
| 2.8.  | ሽጋራ ተትክኹ ዲኹ?                                                              | 1. እወ<br>2. ኣይትክክን                                                               |
| 2.9.  | ብጾታዊ ርክብ ዝመሓላለፍ ሕማም ሓሚምኹ ትፈልጢ ዶ?                                          | 1. እወ<br>2. ኣይፈልጥን                                                               |
| 2.10. | ናይ ኤች.አይ.ቪ ምርመራ ተመርጫርኹ ዶ ትፈልጢ?                                            | 1. እወ<br>2. ኣይተመርመርኩን                                                            |
| 2.11. | መልሱ ንተቁ 2.10 እወ፣ እንተኮይኑ፣ ውፅኢቱ እንታይ ነይሩ?                                   | 1. ኣለኒ<br>2. የብለይን<br>3. ኣይፍለጥን                                                  |
| 2.12. | መልሱ ንተቁ 2.12 ኣለኒ እንተኮይኑ፣ ናይ ፀረ ኤች. አይ. ቪ መድሓኒት ጀሚርኹ ዶ?                    | 1. እወ<br>2. ኣይጀመርኩን                                                              |
| 2.13. | ብናይ ኣፍ ማህፀን ካንሰር ዝተተሓዘ ሰብ ትፈልጢ ዶ?                                         | 1. እወ<br>2. ኣይፈልጠን                                                               |
| 2.14. | ብ ናይ ማህፀን ኣፍ ካንሰር ዝተተሓዘት ቤተሰብ (ኣዶኹ ወይም ሓፍትኹ) ኣለኹ ዶ?                       | 1. እወ<br>2. ኣብለይን                                                                |
| 2.15. | ኣብ ሂወትኹ ክንደይ ስብኣይ ኔርምኹ?                                                   | _____                                                                            |
| 2.16. | ስብኣይኹ ካልኣት ኣንስቲ ኣለዎኦ ዶ?                                                   | 1. እወ<br>2. የብሉን                                                                 |

3. ናይ ኣፍ ማህፀን ካንሰር ኣፋልጦ ብተመልከት

| ተ.ቁ  | ሕቶታት                                                                 | መልሱ                                                                                                                             |
|------|----------------------------------------------------------------------|---------------------------------------------------------------------------------------------------------------------------------|
| 3.1. | ብዛዕባ ናይ ኣፍ ማህፀን ካንሰር ኣንቢብኪ ፣ ርኢኪ፣ ሰሚዕኪ፣ ትፈልጢ ዶ?                      | 1. እወ<br>2. ኣይፈልጥን                                                                                                              |
| 3.2. | እቲ ሓበሬታ ናይ ኣፍ ማህፀን ካንሰር ካብ ኣይናይ ፍልፍል ረከብኪዮ? (ካብ ሓደ ንላዕሊ መልሱ ይካኣል እዩ) | 1. ቴሌቪዥንን ሬዲዮ<br>2. መጽሔት ፣ ጋዜጣ ፣ ፖስተር<br>3. በዓል ሞያ ጥዕና<br>4. ኣባል ቤተሰብን ጎረቤትን ኣርኪ<br>5. ናይ ሃይማኖት መራሕቲ<br>6. መምህር<br>7. ካሊኦ _____ |
| 3.3. | ናይ ኣፍ ማህፀን ካንሰር ምልክታት እንመን እዮም? (ካብ ሓደ ንላዕሊ መልሱ ይካኣል እዩ)             | 1. መደመይቲ ካብ ሞንጎ ወርሓዊ ጽጌያት<br>2. ሕማቕ ጨና ዘለዎ ናይ ማህፀን ፈሳሲ<br>3. መደመይቲ ድሕረ ጾታዊ ርክብ<br>4. ኣይፈልጥን<br>5. ካሊኦ _____                     |

|       |                                                                           |                                                                                                                                                                                                                                              |
|-------|---------------------------------------------------------------------------|----------------------------------------------------------------------------------------------------------------------------------------------------------------------------------------------------------------------------------------------|
| 3.4.  | <p>ናይ ኣፍ ማህፀን ካንሰር ከቃልዑ ዝክእሎ ነገራት?<br/>(ካብ ሓደ ንላዕሊ መልሲ ይካኣል እዩ)</p>       | <p>1. ን HPV ምግላፅ      2. ካብ ሓደ ሰብኣይ ንላዕሊ ይታወቅ ርክብ ብምግባር<br/>3. ትሕቲ ዕድመ ይታወቅ ርክብ ብምግባር      4. ብዙሓት ቐልዑ ምውላድ<br/>5. ናይ ጥንሲ መከላከሊ ክኒን      6. ሽጋራ ምትካክ<br/>7. HIV/AIDS      8. ኣይፈልጥን      9. ካሊኣ _____</p>                                    |
| 3.5.  | <p>ናይ ኣፍ ማህፀን ካንሰር ዝቃልዑ ንንመን እዩን?</p>                                     | <p>1. ካብ 50 ዓመት ንላዕሊ ዝኮና      2. ኣብ ክልል ዕድመ ምውላድ ዘለዎ<br/>3. ኣብ ክልቲኡ ክልል ዕድመ ዘለዎ      4. ኣይፈልጦን</p>                                                                                                                                           |
| 3.6.  | <p>ከመይ ገይረና ናይ ኣፍ ማህፀን ካንሰር ንክላከል?<br/>(ካብ ሓደ ንላዕሊ መልሲ ይካኣል እዩ)</p>       | <p>1. HPV ክትባት ምውላድ      2. ካብ ምስ ሓደ ሰብኣይ ንላዕሊ ይታወቅ ርክብ ዘይምግባር<br/>3. ትሕቲ ዕድመ ይታወቅ ርክብ ዘይምግባር      4. ብዙሓት ቐልዑ ዘይምውላድ<br/>5. ናይ ጥንሲ መከላከሊ ክኒን ዘይምውላድ      6. ሽጋራ ዘይምትካክ<br/>7. ናይ ኣፍ ማህፀን ካንሰር ምርመራ ብምግባር      8. ዘይፈልጥ<br/>9. ካሊኣ _____</p> |
| 3.7.  | <p>ቀልጢፍኪ እንተተሓከምኪ ናይ ኣፍ ማህፀን ካንሰር ክድሕን ይክእል ዶ?</p>                        | <p>1. እወ      2. ኣይድሕንን      3. ኣይፈልጥን</p>                                                                                                                                                                                                   |
| 3.8.  | <p>ሓንቲ ናይ ኣፍ ማህፀን ካንሰር ተጠቓዒት ብከመይ መንገዲ ትሕከም? (ካብ ሓደ ንላዕሊ መልሲ ይካኣል እዩ)</p> | <p>1. ናይ ባህሊ ሕክምና      2. መጥባሕቲ      3. ኣብ ሆስፒታል ዝወሃብ መድሓኒት<br/>4. ናይ ጨረር ምርመራ      5. ኣይፈልጥን      6. ካሊኣ _____</p>                                                                                                                          |
| 3.9.  | <p>ዋጋ ናይ ማህፀን ካንሰር ሕክምና ከመይ ትሪእኡ?</p>                                     | <p>1. ነፃ እዩ      2. ተመጣጣኒ ዋጋ      3. ብመጠኑ ክባር እዩ<br/>4. ከባር እዩ      5. ኣይፈልጥን      6. ካሊኣ _____</p>                                                                                                                                          |
| 3.10. | <p>ን ኣፍ ማህፀን ካንሰር ቅድመ ካንሰር ምርመራ ኣለዎ ዶ?</p>                                | <p>1. እወ      2. ኣይፈልጥን</p>                                                                                                                                                                                                                  |
| 3.11. | <p>ናይ ኣፍ ማህፀን ቅድመ ካንሰር ምርመራ ጥቕምታት ሰሚዖኺ ዶ ትፈልጢ?</p>                        | <p>1. እወ      2. ኣይፈልጥን</p>                                                                                                                                                                                                                  |
| 3.12. | <p>ናይ ኣፍ ማህፀን ቅድመ ካንሰር ምርመራ በበክንደይ ጊዜ ክግበር ኣለዎ? (ካብ ሓደ ንላዕሊ መልሲ ይካኣል)</p> | <p>1. ሓደ ጊዜ ኣብ 9 መዓት      2. ሓደ ጊዜ ኣብ 3 መዓት      3. ሓደ ጊዜ ኣብ 5 መዓት<br/>4. ኣይፈልጥን      5. ካሊኣ _____</p>                                                                                                                                       |

|       |                                                                                   |                                                                                                                       |
|-------|-----------------------------------------------------------------------------------|-----------------------------------------------------------------------------------------------------------------------|
| 3.13. | ናይ ኣፍ ማህፀን ቅድመ ካንሰር ምርመራ ኣብ ኣይናይ ጉጅለ ደቂ ኣንስቲዮ ክግበር ኣለዎ? ( ካብ ሓደ ንላዕሊ መልሲ ይካኣል እዩ) | 1. 25 ዓመትን ካብኡ ንላዕሊን ዝኾና ደቂ ኣንስቲዮ<br>2. ነበሰን ሸይጠን ዝናበራ ደቂ ኣንስቲዮ      3. ዓበይቲ ደቂ ኣንስቲዮ<br>4. ኣይፈልጥን      5. ካልኣት _____ |
| 3.14. | ናይ ኣፍ ማህፀን ቅድመ ካንሰር ምርመራ ከመይ ኣይነት ምርመራ ከምዝካየድ ትፈልጢ ዶ?                             | 1. እወ      2. ኣይፈልጥን                                                                                                  |
| 3.15. | ናይ ቅድመ ካንሰር ምርመራ ብከመይ መንገድ ይካየድ? ( ካብ ሓደ ንላዕሊ መልሲ ይካኣል እዩ)                        | 1. VIA      2. VIU      3. PAP Smear      4. ኣይፈልጥን<br>5. ካሊኡ _____                                                   |

**4. ኣመለካክታ ናይ ኣፍ ማህፀን ቅድመ ካንሰር ምርመራ ዝምልከት**

| ተ.ቁ  | ሕቶታት                                                                              | መልሲ                                                                              |
|------|-----------------------------------------------------------------------------------|----------------------------------------------------------------------------------|
| 4.1. | ናይ ኣፍ ማህፀን ካንሰር ኣብ ኢትዮጵያ እቲ ዝበዘሐ ናይ ካንሰር ሞት ፣ ዋና ናይ ሕ/ሰብ ጥዕና ፀገም ድዩ?              | 1. ብጣዕሚ ኣይስማዕምን      2. ኣይስማዕምን<br>3. ሓሳብ የብለይን      4. ተስማሚዐ      5. ብጣዕሚ ይስማዕም |
| 4.2. | ዝኮነት መንእሰይ ጓል ኣንስተይቲን ንዐኪ ወሲኩን ናይ ኣፍ ማህፀን ካንሰር ክሕዘክን ይክኣል ዶ ?                     | 1. ብጣዕሚ ኣይስማዕምን      2. ኣይስማዕምን<br>3. ሓሳብ የብለይን      4. ተስማሚዐ      5. ብጣዕሚ ይስማዕም |
| 4.3. | ናይ ኣፍ ማህፀን ካንሰር ቀዲሙ እንተዘይተመርመሩ ንሞት የጋልፅ ዶ?                                        | 1. ብጣዕሚ ኣይስማዕምን      2. ኣይስማዕምን<br>3. ሓሳብ የብለይን      4. ተስማሚዐ      5. ብጣዕሚ ይስማዕም |
| 4.4. | ናይ ኣፍ ማህፀን ካንሰር ካብ ሓደ ሰብ ናብ ሓደ ሰብ ክሓልፉ ኣይክኣልን ?                                   | 1. ብጣዕሚ ኣይስማዕምን      2. ኣይስማዕምን<br>3. ሓሳብ የብለይን      4. ተስማሚዐ      5. ብጣዕሚ ይስማዕም |
| 4.5. | ቅድሚ ምልክታት ምርኣዮም ናይ ኣፍ ማህፀን ካንሰር ምርመራ ብምገባር ናይ ኣፍ ማህፀን ካንሰር ምክልኻል ይካኣል ኢልኪ ታኣምኒ ዶ? | 1. ብጣዕሚ ኣይስማዕምን      2. ኣይስማዕምን<br>3. ሓሳብ የብለይን      4. ተስማሚዐ<br>5. ብጣዕሚ ይስማዕም   |
| 4.6. | ምፍታሽ/ምምርማር ንተገልጋሊይ /ዓሚል ጉድኣት የብሉን ?                                               | 1. ብጣዕሚ ኣይስማዕምን      2. ኣይስማዕምን<br>3. ሓሳብ የብለይን      4. ተስማሚዐ      5. ብጣዕሚ ይስማዕም |
| 4.7. | ምፍታሽ /ምምርማር ናይ ኣፍ ማህፀን ካንሰር ክባር ኣይኮነንን ?                                          | 1. ብጣዕሚ ኣይስማዕምን      2. ኣይስማዕምን<br>3. ሓሳብ የብለይን      4. ተስማሚዐ<br>5. ብጣዕሚ ይስማዕም   |

|       |                                                              |                                  |                                          |
|-------|--------------------------------------------------------------|----------------------------------|------------------------------------------|
| 4.8.  | እንድሕር ምምርመራ ነፃ እና ምክንያታዊ ጉድኣት ዘይብሉ ምርመራ ክትገብሪ ትክዕሊ ዶ?        | 1. ብጣዕሚ ኣይስማዕማዕን<br>3. ሓሳብ የብለይን | 2. ኣይስማማዕን<br>4. ተሰማሚዐ<br>5. ብጣዕሚ ይስማዕማዕ |
| 4.9.  | እንድሕር ናብ ኣፍ ማህፀን ቅድመ ካንሰር ምርመራ ደሊኪ ተባዓታይ ዶክተር ክምርምረኪ ትፈቕዲ ዶ? | 1. ብጣዕሚ ኣይስማዕማዕን<br>3. ሓሳብ የብለይን | 2. ኣይስማማዕን<br>4. ተሰማሚዐ<br>5. ብጣዕሚ ይስማዕማዕ |
| 4.10. | እንድሕር ናብ ኣፍ ማህፀን ካንሰር ሃሊውኪ ብዘይምፍራሕ ንዶክተር ተማክሪ ዶ?             | 1. ብጣዕሚ ኣይስማዕማዕን<br>3. ሓሳብ የብለይን | 2. ኣይስማማዕን<br>4. ተሰማሚዐ<br>5. ብጣዕሚ ይስማዕማዕ |

**5. ናይ ኣፍ ማህፀን ካንሰር ዘይምምርመራ ዝምልከት**

| ተ.ቁ  | ሕቶታት                                                  | መልሲ                                                                                                                                                                                                                                                                                                                                       |
|------|-------------------------------------------------------|-------------------------------------------------------------------------------------------------------------------------------------------------------------------------------------------------------------------------------------------------------------------------------------------------------------------------------------------|
| 5.1. | ቅድሚ ሓዚ ናይ ኣፍ ማህፀን ካንሰር ዘይምፍታሽ/ዘይምርመራ ምክንያታትኪ እንታይ እዩ? | 1. ግዲ ዘይምህላው<br>2. ተጋላፂት እየ ዘይምባል<br>3. ጠቓሚ እዩ ኢልካ ዘይምሕሳብ<br>4. ምስ ስብኣይካ ብሓሳብ ዘይምስምዕማዕ<br>5. ክባር ዋጋ ምርመራ<br>6. ናይ ካንሰር ምርመራ ውጊኢት ምፍራሕ<br>7. ናይ ማህፀን ካንሰር መመርመሪ መሳርሒ ቃንዛ ምፍራሕ<br>8. ናይ ማህፀን ካንሰር መመርመሪ መሳርሒ ኣበይ ከም ዝርከብ ዘይምፍላጥ<br>9. ናይ ማህፀን ካንሰር መመርመሪ ቦታ ኣብ ቀረባ ዘይምህላው<br>10. እምነት ኣብ ሃይማኖት ምህላው<br>11. ናይ ሓኪም ምክሪ ምስኣን<br>12. ካልእ _____ |
| 5.2. | ኣብ ናይ ኣፍ ማህፀን ካንሰር ምርመራ ምስ ስብኣይኪ ምክሪ ትገብሪ ዶ?          | 1. እወ<br>2. ኣይፈልጥን                                                                                                                                                                                                                                                                                                                        |

**6. ርሕቀት ናይ ኣፍ ማህፀን ካንሰር ምርመራ ቦታ ዝምልከት**

| ተ.ቁ  | ሕቶታት                                      | መልሲ                                                                      |
|------|-------------------------------------------|--------------------------------------------------------------------------|
| 6.1. | ናይ ኣፍ ማህፀን ካንሰር ምርመራ ቦታ ሰሚዕኪ ትፈልጢ ዶ?      | 1. እወ<br>2. ኣይፈልጥን                                                       |
| 6.2. | ናይ ኣፍ ማህፀን ካንሰር ምርመራ ቦታ ካብ ገዛኪ ክንደይ ይርሕቅ? | _____ኪ/ሜትር<br>1. ብጣዕሚ ቀረባ<br>2. ቀረባ<br>3. ማእኸላይ<br>4. ርሕቅ<br>5. ብጣዕሚ ርሕቅ |
| 6.3. | ናብ ኣፍ ማህፀን ካንሰር ምርመራ ቦታ መጓዕዛዚ እንታይ እዩ?    | 1. ናይ እግሪ ጉዕዞ<br>2. ብናይ ህዝቢ መጓዕዛዚ መኪና<br>3. ካሊኡ _____                    |

|      |                                           |                                      |
|------|-------------------------------------------|--------------------------------------|
| 6.4. | እንድሕር ብናይ ህዝቢ መጓዳዚ መኪና ኮይኑ ከንደይ ቕርሻ ትክፍላ? | _____                                |
| 6.5. | ናይ መኪና መጓዳዚ ዋጋ ከመይ ትርእኡ ?                 | 1. ማእከላይ                      2. ክባር |

**? ተሳተፊኽን ካብ ልቢ ነመሰግን !**
